# Supplementary material for: An RNA Thermometer Activity of the West Nile Virus Genomic 3′-Terminal Stem-Loop Element Modulates Viral Replication Efficiency during Host Switching
Source: MDPI journal article supplement (doi:10.3390/v12010104), 2020-01-15
Supplement: s1 [file s1]

## Supplementary Table 1

### DNA oligonucleotides used in this study

| name                                                        | sequence                                                                       |
|-------------------------------------------------------------|--------------------------------------------------------------------------------|
| <b>cloning of cDNAs encoding different WNV replicon RNA</b> |                                                                                |
| 3SLMut1For                                                  | GGTGCAGAGAACAGAGGATCTGGGTCG                                                    |
| 3SLMut1Rev                                                  | CGACCCAGATCCTCTGTTCTCGCACC                                                     |
| 3SLMut2For                                                  | GGTGGTGCAGAGACAGGATCTGG                                                        |
| 3SLMut2Rev                                                  | CCAGATCCTGTGCTCTCGCACCACC                                                      |
| 3SLMut3For                                                  | GGTGGTGCAGAGACAGGATCTGGGTCG                                                    |
| 3SLMut3Rev                                                  | CGACCCAGATCCTCTGCTCTCGCACCACC                                                  |
| <b>PCR templates for in vitro transcription</b>             |                                                                                |
| 5UTRWestFor                                                 | ATAAGCTTTAATACGACTCACTATAGGAGTAGTTCGCCTGTGTGAGCTGA                             |
| 3UTRnativRev                                                | AGATCCTGTGTTCTCGCACCACCAGCC                                                    |
| 3'UTRRevMut1                                                | AGATCCTCTGTTCTCGCACCACC                                                        |
| 3'UTRRevMut2                                                | AGATCCTGTGCTCTCGCACCACC                                                        |
| 3'UTRRevMut3                                                | AGATCCTCTGCTCTCGCACCACC                                                        |
| <b>Exon-intron PCR</b>                                      |                                                                                |
| C636 Exon4 Fw                                               | AAGGAGGTGGACGTCAAGAAGG                                                         |
| C636 Intron4 Rv                                             | GCTTCAGTTTTCAAGCACTGAAGG                                                       |
| <b>SUMO expression plasmids</b>                             |                                                                                |
| AUF1 Aedes<br>BsaIFor                                       | ATGGTCTCATGGTGCCGATCAGGATCAAGAG                                                |
| AUF1 Aedes<br>BamHIRev                                      | ACGGATCCTTAGTACGGCGTATGCCTTGG                                                  |
| <b>FLAG-p30 and p32 fusion transcribed from pSinRep5</b>    |                                                                                |
| C636AUF1XbaFw                                               | ATTCTAGAGCCACCATGGATTACAAGGATGACGACGATAAGGCCCGG<br>GCGGATGCCGATCAGGATCAAGAGATG |
| C636AUF1ApaIRv                                              | ATGGGCCCTTAGTACGGCGTATGCCTTGGCTG                                               |
| <b>cloning of cDNAs encoding WNV replicon NS5mut RNA</b>    |                                                                                |
| NS5PolQuikFor                                               | GCTGTCAGTGGAGATGCCTGTGTGGTAAAGCCC                                              |
| NS5PolQuikRev                                               | GGGCTTTACCACACAGGCATCTCCACTGACAGC                                              |

## Supplementary Table 2

### RNA oligonucleotides used in this study

| <b>name</b>           | <b>sequence</b>                                   |
|-----------------------|---------------------------------------------------|
| 3'SL <sup>trunc</sup> | Cy5-AGAUCUUCUGCUCUGCACAAUGGUGCGAGAACACAGGAUCU-BHQ |
| 5'UAR                 | UCUUAGCACGAAGAUCU                                 |
| AU/GU-rich RNA        | FAM-EX-5'-UAUUUAGUGGUGUUAG-3'                     |
| random RNA            | FAM-EX-5'-CUAAGAUGCUCGCUGC-3'                     |
| 5CS WNV Cy5           | Cy5-UGUCAAUUAUGC UAA                              |
| 3CS WNV Cy3           | Cy3-AGCAUAUUGACACC                                |

## Supplementary methods

### *Plasmid encoding WNV NS5mut replicon*

To obtain replicon-encoding cDNAs with mutations in the NS5 gene, the SpeI-SacII fragment of pWNV (Shi et al., 2002) was subcloned into pGEM-T Easy. Site-directed mutagenesis was carried out using primers NS5PolQuikFor and NS5PolQuikRev. The SpeI-SacII fragment with the corresponding mutation was cloned into pWNVRLuc.

### *RNA gel-shift assay*

RNA-RNA interactions were analysed by electrophoretic mobility shift assays as performed earlier (Friedrich et al., 2014). The binding reaction contained 5 mM HEPES/NaOH, pH 7.9, 100 mM KCl, 5 mM MgCl<sub>2</sub>, 1 mM dithiothreitol, uniformly <sup>32</sup>P-labelled 5'-RNA (5' 162 Nt) (2 nM) and non-labelled 3'-RNA (3' 111 Nt) (2 nM) in a final volume of 20 µl. The binding reaction was performed at the indicated temperatures for 2 h. The RNA-RNA complexes were resolved by native 5% polyacrylamide gel electrophoresis in 1 x TBE at 4°C, analysed by phosphor imaging and quantified by ImageQuant Software (GE). Signal intensities were blotted as a function of 3'-RNA concentration and fitted by KaleidaGraph (Synergy) to a single-site binding model to determine the dissociation constant  $K_D$ :

$$S = S_{\max} \cdot x / (K_D + x)$$

S - radioactive signal;  $S_{\max}$  - maximal signal amplitude; x - concentration of the 3'-RNA;  $K_D$  - dissociation constant.

## Supplementary Figures

### Figure S1

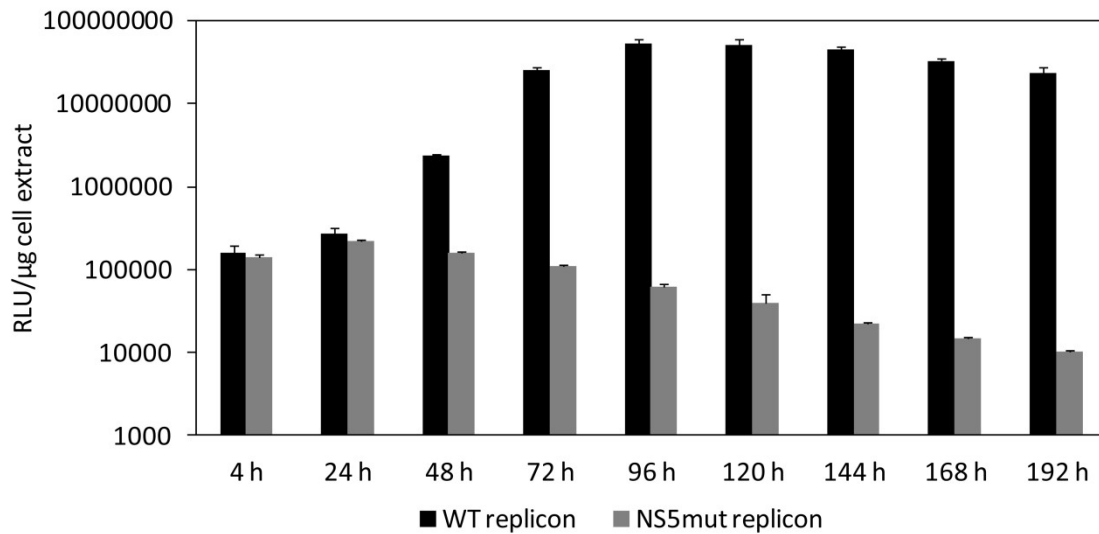

**Fig. S1. Time course of RLuc activity in cells transfected with WNV replicons.** Huh7 cells were transfected with wild-type and NS5mut WNV RLuc replicon RNAs, subsequently cultivated at 28°C and analysed for luciferase reporter activity at the indicated time-points post transfection. Results from two independent transfections with two technical replicates are shown; error bars reflect standard deviations. Please note that the values for the RLuc activity are higher compared to results from the main manuscript due to a different luminometer used.

## Figure S2

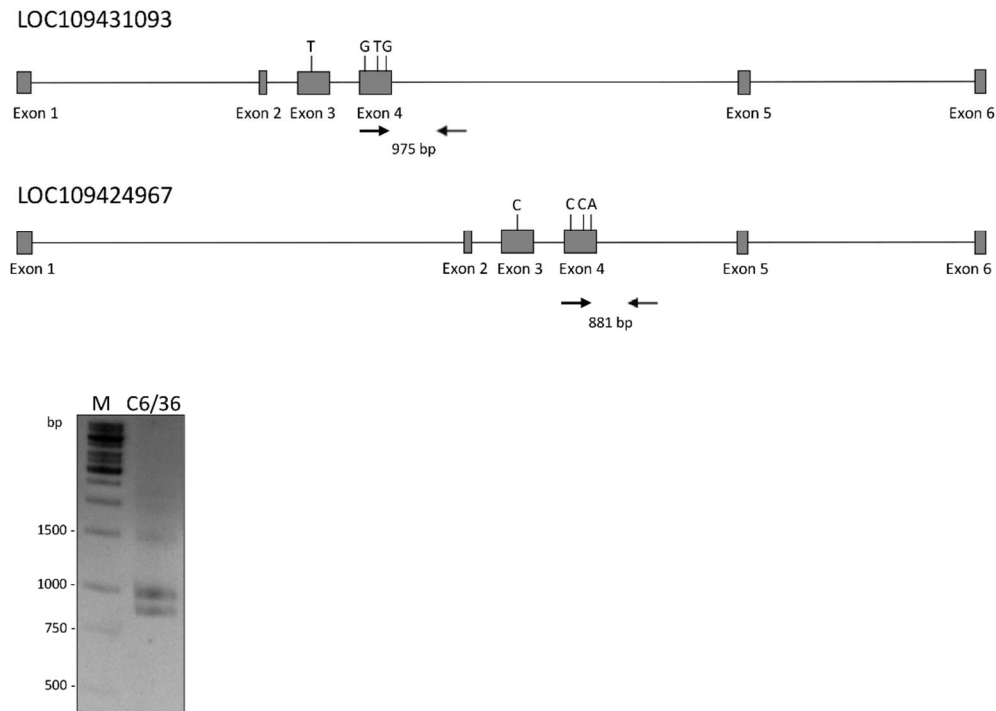

**Fig. S2. Exon-intron organization of two genomic loci in C6/36 cells encoding AUF1-homologous proteins.** (Top) The two loci mainly differ in their intron sequence. Nucleotide differences in exons 3 and 4 do not change the amino acid sequence. Arrows indicate the location of PCR primer binding sites. PCR product sizes are indicated. (Bottom) The PCR products from the exon-intron PCR were analysed on an agarose gel in parallel with a molecular weight marker (M).

## Figure S3

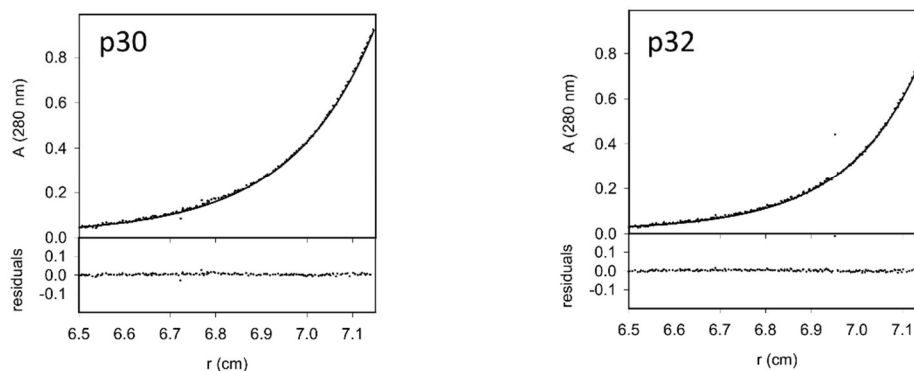

**Fig. S3. Mosquito squid p30 and p32 are monomeric proteins.** In sedimentation equilibrium experiments (analytical ultracentrifugation) 12  $\mu\text{M}$  (p30) and 7  $\mu\text{M}$  (p32) of protein was analyzed at 14000 rpm at 20°C. No aggregation of the proteins was observed in the course of the experiment.

#### Figure S4

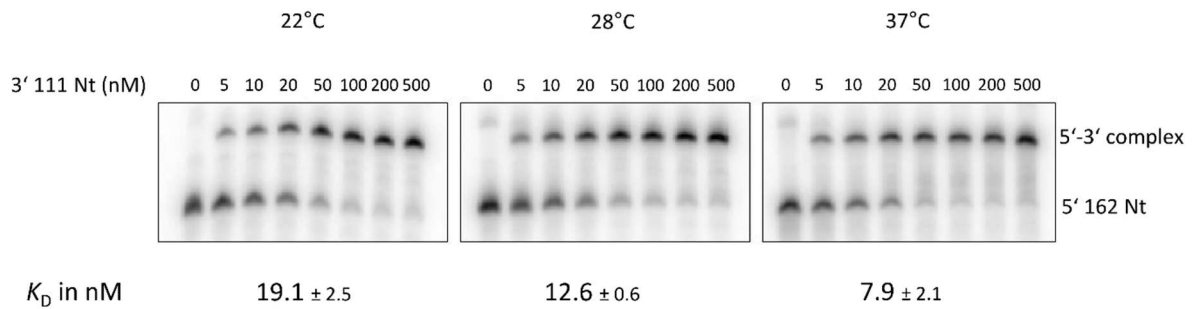

**Fig. S4. 5'-3' RNA-RNA interaction is increased at higher temperatures.**  $^{32}\text{P}$ -labelled 5'-RNA (5' 162 Nt) (2 nM) and non-labelled 3'-RNA (3' 111 Nt) (2 nM) were incubated at the indicated temperatures for 2 h. The RNA-RNA complexes were resolved by native 5% polyacrylamide gel electrophoresis, analysed by phosphor imaging and quantified by ImageQuant Software (GE). The signal intensities were fitted as a function of 3'-RNA concentration to obtain the binding affinities (shown below). Average results and standard deviations ( $n = 3$ ) are shown.

#### References

1. Friedrich, S.; Schmidt, T.; Geissler, R.; Lilie, H.; Chabierski, S.; Ulbert, S.; Liebert, U.G.; Golbik, R.P.; Behrens, S.E. AUF1 p45 promotes West Nile virus replication by an RNA chaperone activity that supports cyclization of the viral genome. *J Virol* 2014, 88, 11586-11599, doi:JVI.01283-14
2. Shi, P.Y.; Tilgner, M.; Lo, M.K. Construction and characterization of subgenomic replicons of New York strain of West Nile virus. *Virology* 2002, 296, 219-233
